# Supplementary material for: Relationship between Serum 25(OH)D and Depression: Causal Evidence from a Bi-Directional Mendelian Randomization Study
Source: PubMed Central journal article supplement (PMC7823924; doi:10.3390/nu13010109), 2020-12-30
Supplement: nutrients-13-00109-s001.pdf [file nutrients-13-00109-s001.pdf]

### Supplementary note: Mendelian Randomisation

Mendelian randomisation (MR) uses genetic variants (commonly from genome-wide association studies (GWAS) as a proxy measure (“genetic instrument”) for the exposure in the hypothesis testing of the causal association of the exposure on the outcome (1). Unlike observational association studies, MR studies are less affected by unmeasured confounding factors and reverse causation as the genetic variants are defined at the time of conception (2). Commonly, MR referred as the natural randomised control trial (2) (Figure S3 Panel A). In our study, we selected the genetic variants that instrument the exposure of interest (25(OH)D or depression, depending on the direction of the association) from the latest GWAS (preferably not including UK Biobank, unless it is for sensitivity analysis), and applied different MR methods (Inverse variance weight, MR-PRESSO, weighted median, weighted mode and MR-Egger) for testing the bidirectional causal association between 25(OH)D and depression. The coefficients from MR analyses may indicate a valid causal effect estimate under the condition of the following three core assumptions: the genetic instrument needs to be robustly associated with the exposure (‘relevance’), there should be no joint causal influence affecting both the instrument and the outcome (‘independence’), and the instrument should not affect the outcome through any other mechanism than through the exposure (‘exclusion restriction’) (2). Various analyses including MR-PRESSO outlier detection and distortion tests, MR-Egger intercept test, and leave-one-out analyses were applied to check for the effect of horizontal pleiotropy (violation of ‘exclusion restriction’ assumption) and restricted the analyses to white British with further adjustment for 40 principal components and assessment centre for controlling residual confounding effect from population structure (violation of ‘independence’ assumption). Commonly the first assumption (‘relevance’) fulfilled when variants, that are associated with the exposure at genome-wide significant level ( $5 \times 10^{-8}$ ), are taken from the GWAS.

**Table S1.** List of 25(OH)D-related variants, and its association with serum 25(OH)D level among UK Biobank and discovery cohort

| SNP        | Chr. | Nearest Gene | EA/OA | UK Biobank |            |        |        |           | Discovery GWAS(3) |        |        |          |
|------------|------|--------------|-------|------------|------------|--------|--------|-----------|-------------------|--------|--------|----------|
|            |      |              |       | MAF        | Info Score | Beta   | SE     | p-Value   | MAF               | Beta   | SE     | P        |
| rs3755967  | 4    | GC           | C/T   | 0.29       | 0.99       | 0.0840 | 0.0014 | 2.6E-365  | 0.28              | 0.0892 | 0.0023 | 4.7E-343 |
| rs12785878 | 11   | DHCR7        | T/G   | 0.21       | 1.00       | 0.0521 | 0.0016 | 5.00E-236 | 0.25              | 0.0363 | 0.0022 | 3.81E-62 |
| rs10741657 | 11   | CYP2R1       | A/G   | 0.41       | 1.00       | 0.0351 | 0.0013 | 7.00E-225 | 0.40              | 0.0308 | 0.0022 | 2.05E-46 |
| rs10745742 | 12   | AMDHD1       | T/C   | 0.38       | 0.99       | 0.0128 | 0.0014 | 1.10E-21  | 0.40              | 0.0165 | 0.0022 | 1.88E-14 |
| rs8018720  | 14   | SEC23A       | G/C   | 0.18       | 1.00       | 0.0151 | 0.0017 | 1.20E-27  | 0.18              | 0.0168 | 0.0029 | 4.72E-09 |
| rs17216707 | 20   | CYP24A1      | T/C   | 0.18       | 0.96       | 0.0171 | 0.0017 | 2.00E-25  | 0.21              | 0.0263 | 0.0027 | 8.14E-23 |

SNP: single nucleotide polymorphism; EA/OA: effect allele/other allele; MAF: Minor allele frequency. Info score (imputation quality indicator, all with >0.96 info score). Effect estimates from UK Biobank and discovery GWAS were from linear regression of variants on natural-log transformed 25(OH)D. No genetic overlap with variants used to index depression (Correlation  $R^2 < 0.00386$  for all).

**Table S2.** List of major depressive disorder-related variants used to construct the genetic risk scores

| The 44 major depressive disorder-related variants from Wray et al.(4) |      |                                    |       |      |            |                     |                                                                                                  |
|-----------------------------------------------------------------------|------|------------------------------------|-------|------|------------|---------------------|--------------------------------------------------------------------------------------------------|
| Variant                                                               | Chr. | Nearest gene                       | EA/OA | MAF  | INFO Score | Proxy Variant used? | Hyde et al Variant Replicated in Wray et al (r <sup>2</sup> with the Lead Variant of Wray et al) |
| rs12129573                                                            | 1    | <i>LINC01360</i>                   | A/C   | 0.35 | 0.99       | No                  | rs2422321 (0.25)                                                                                 |
| rs1432639                                                             | 1    | <i>NEGR1</i>                       | A/C   | 0.40 | 0.99       | No                  | rs11209948 (1.00)                                                                                |
| rs159963                                                              | 1    | <i>RERE, SLC45A1</i>               | C/A   | 0.41 | 0.99       | No                  | rs301806 (0.96)                                                                                  |
| rs2389016                                                             | 1    |                                    | T/C   | 0.30 | 0.99       | No                  |                                                                                                  |
| rs4261101                                                             | 1    |                                    | G/A   | 0.36 | 0.99       | No                  |                                                                                                  |
| rs9427672                                                             | 1    | <i>DENND1B</i>                     | G/A   | 0.23 | 0.99       | No                  |                                                                                                  |
| rs11682175                                                            | 2    | <i>VRK2</i>                        | C/T   | 0.47 | 0.99       | No                  | rs1518395 (0.38)                                                                                 |
| rs1226412                                                             | 2    | <i>LINC01876, NR4A2, GPD2</i>      | T/C   | 0.20 | 0.99       | No                  |                                                                                                  |
| rs9862324 <sup>1</sup>                                                | 3    | <i>TOPAZ1, TCAIM, ZNF445</i>       | C/T   | 0.32 | 0.99       | Yes                 |                                                                                                  |
| rs7430565                                                             | 3    | <i>RSRC1, LOC1000996447, MLF1</i>  | G/A   | 0.42 | 0.99       | No                  | rs1656369 (0.28)                                                                                 |
| rs34215985                                                            | 4    | <i>SLC30A9, LINC00682, DCAF4L1</i> | G/C   | 0.20 | 0.98       | No                  |                                                                                                  |
| rs2018142 <sup>1</sup>                                                | 5    |                                    | C/A   | 0.48 | 0.99       | Yes                 |                                                                                                  |
| rs27732 <sup>1</sup>                                                  | 5    | <i>LINC00461, MEF2C</i>            | A/G   | 0.40 | 0.98       | Yes                 | rs454214 (0.89)                                                                                  |
| rs11135349                                                            | 5    |                                    | C/A   | 0.46 | 0.99       | No                  | rs4543289 (0.99)                                                                                 |
| rs34660260 <sup>2</sup>                                               | 5    | <i>LOC101927421</i>                | C/T   | 0.40 | 0.98       | No                  |                                                                                                  |
| rs4869056                                                             | 5    | <i>TENM2</i>                       | G/A   | 0.38 | 0.99       | No                  |                                                                                                  |
| rs3095337 <sup>2</sup>                                                | 6    | <i>extended MHC</i>                | G/C   | 0.21 | 0.99       | No                  |                                                                                                  |
| rs9402472                                                             | 6    | <i>C6orf168, FBXL4</i>             | A/G   | 0.24 | 0.98       | No                  |                                                                                                  |
| rs6460902 <sup>1</sup>                                                | 7    | <i>TMEM106B, VWDE</i>              | A/G   | 0.42 | 0.99       | Yes                 |                                                                                                  |
| rs12666117                                                            | 7    |                                    | A/G   | 0.46 | 0.99       | No                  |                                                                                                  |
| rs958538 <sup>1</sup>                                                 | 9    |                                    | T/C   | 0.25 | 0.99       | Yes                 |                                                                                                  |
| rs1354115                                                             | 9    | <i>PUM3, LINC01231</i>             | A/C   | 0.37 | 0.99       | No                  | rs7044150 (0.96)                                                                                 |
| rs7029033                                                             | 9    | <i>DENND1A, LHX2</i>               | T/C   | 0.07 | 0.99       | No                  |                                                                                                  |
| rs7856424                                                             | 9    | <i>ASTN2</i>                       | C/T   | 0.28 | 0.99       | No                  |                                                                                                  |
| rs61867293                                                            | 10   | <i>SORCS3</i>                      | C/T   | 0.19 | 0.99       | No                  | rs10786831 (0.11)                                                                                |
| rs1806153                                                             | 11   | <i>DKFZp686K1684, PAUPAR, ELP4</i> | T/G   | 0.23 | 0.99       | No                  |                                                                                                  |
| rs4074723                                                             | 12   | <i>SOX5</i>                        | C/A   | 0.41 | 0.99       | No                  |                                                                                                  |
| rs4143229                                                             | 13   | <i>ENOX1, LACC1, CCDC122</i>       | C/A   | 0.44 | 0.99       | No                  |                                                                                                  |
| rs12552                                                               | 13   | <i>OLFM4, LINC01065</i>            | A/G   | 0.07 | 0.99       | No                  | rs12552 (1.00)                                                                                   |
| rs3742786 <sup>1</sup>                                                | 14   | <i>DLST, PROX2, RPS6KL1</i>        | A/G   | 0.46 | 0.99       | Yes                 |                                                                                                  |
| rs10149470                                                            | 14   | <i>BAG5, APOPT1</i>                | G/A   | 0.48 | 0.99       | No                  |                                                                                                  |
| rs4904738                                                             | 14   | <i>LRFN5</i>                       | C/T   | 0.43 | 0.99       | No                  |                                                                                                  |
| rs915057                                                              | 14   | <i>SYNE2, MIR548H1, ESR2</i>       | G/A   | 0.43 | 0.99       | No                  |                                                                                                  |
| rs8025231                                                             | 15   |                                    | C/A   | 0.45 | 0.99       | No                  | rs8025231 (1.00)                                                                                 |
| rs11643192                                                            | 16   | <i>PMFBP1, DHX38</i>               | A/C   | 0.38 | 0.99       | No                  |                                                                                                  |
| rs7198928                                                             | 16   | <i>RBFOX1</i>                      | T/C   | 0.38 | 0.98       | No                  |                                                                                                  |
| rs7200826                                                             | 16   | <i>SHISA9, CPPED1</i>              | T/C   | 0.26 | 0.99       | No                  |                                                                                                  |
| rs8063603                                                             | 16   | <i>RBFOX1</i>                      | G/A   | 0.32 | 0.98       | No                  |                                                                                                  |
| rs17727765                                                            | 17   | <i>CRYBA1, MYO18A, NUFIP2</i>      | C/T   | 0.08 | 0.95       | No                  |                                                                                                  |
| rs11663393                                                            | 18   | <i>DCC, MIR4528</i>                | A/G   | 0.46 | 0.99       | No                  |                                                                                                  |
| rs12958048                                                            | 18   | <i>TCF4, MIR4529</i>               | A/G   | 0.33 | 0.99       | No                  |                                                                                                  |
| rs1833288                                                             | 18   | <i>RAB27B, CCDC68</i>              | A/G   | 0.28 | 0.97       | No                  |                                                                                                  |
| rs62099069                                                            | 18   | <i>MIR924HG</i>                    | T/A   | 0.42 | 0.99       | No                  |                                                                                                  |
| rs5758265                                                             | 22   | <i>L3MBTL2, EP300-AS1, CHADL</i>   | A/G   | 0.29 | 0.99       | No                  | rs2179744 (0.98)                                                                                 |
| The 17 major depressive disorder-related variants from Hyde et al.(5) |      |                                    |       |      |            |                     |                                                                                                  |
| Variant                                                               | Chr. | Nearest gene                       | EA/OA | MAF  | INFO score | Proxy variant used? |                                                                                                  |
| rs301806                                                              | 1    | <i>RERE</i>                        | C/T   | 0.42 | 0.99       | No                  |                                                                                                  |
| rs2422321                                                             | 1    | <i>NEGR1</i>                       | G/A   | 0.43 | 0.98       | No                  |                                                                                                  |
| rs11209948                                                            | 1    | <i>NEGR1</i>                       | T/G   | 0.40 | 1.00       | No                  |                                                                                                  |
| rs12065553                                                            | 1    |                                    | G/A   | 0.30 | 0.99       | No                  |                                                                                                  |
| rs1518395                                                             | 2    | <i>VRK2</i>                        | G/A   | 0.39 | 0.99       | No                  |                                                                                                  |
| rs1656369                                                             | 3    | <i>RSRC1, MLF1</i>                 | T/A   | 0.35 | 0.99       | No                  |                                                                                                  |
| rs454214                                                              | 5    | <i>TMEM161B, MEF2C</i>             | C/T   | 0.42 | 0.99       | No                  |                                                                                                  |
| rs4543289                                                             | 5    |                                    | T/G   | 0.45 | 0.99       | No                  |                                                                                                  |
| rs10514299                                                            | 5    | <i>TMEM161B, MEF2C</i>             | T/C   | 0.25 | 0.99       | No                  |                                                                                                  |
| rs1475120                                                             | 6    | <i>HACE1, LIN28B</i>               | A/G   | 0.45 | 0.99       | No                  |                                                                                                  |
| rs6476606                                                             | 9    | <i>PAX5</i>                        | A/G   | 0.37 | 0.98       | No                  |                                                                                                  |
| rs7044150                                                             | 9    | <i>KIAA0020, RFX3</i>              | T/C   | 0.37 | 0.99       | No                  |                                                                                                  |
| rs10786831                                                            | 10   | <i>SORCS3</i>                      | A/G   | 0.41 | 0.99       | No                  |                                                                                                  |
| rs2125716                                                             | 12   | <i>SLC6A15</i>                     | G/A   | 0.23 | 0.99       | No                  |                                                                                                  |
| rs12552                                                               | 13   | <i>OLFM4</i>                       | A/G   | 0.44 | 0.99       | No                  |                                                                                                  |
| rs8025231                                                             | 15   | <i>MEIS2, TMCO5A</i>               | C/A   | 0.45 | 0.99       | No                  |                                                                                                  |
| rs2179744                                                             | 22   | <i>L3MBTL2</i>                     | A/G   | 0.28 | 0.99       | No                  |                                                                                                  |

<sup>1</sup> Imputation quality was poor for all six variants (info score <0.89 and MAF<0.01), hence we replaced them with a proxy variant (LD r<sup>2</sup>≥ 0.8, info score ≥ 0.95). <sup>2</sup> These indicate SNPs (single nucleotide polymorphism) with two alternative rs-numbers: rs116755193 for rs34660260, and rs115507122 for rs3095337. EA/OA: Effect allele/Other allele. MAF: Minor allele frequency. Please see Figure S2 for the association of these variants with MDD among UK Biobank and discovery study.

**Table S3.** Prevalence of depression and summary of 25(OH)D across different characteristics

|                                           | n (%)          | Depression    |                              | Serum 25(OH)D in nmol/L |                              |
|-------------------------------------------|----------------|---------------|------------------------------|-------------------------|------------------------------|
|                                           |                | n (%)         | <i>p</i> -Value <sup>1</sup> | Median (IQR)            | <i>p</i> -Value <sup>2</sup> |
| Townsend deprivation index                |                |               | $3.8 \times 10^{-105}$       |                         | $<1.0 \times 10^{-300}$      |
| • Highly deprived (above median)          | 113,021 (49.3) | 17,640 (15.6) |                              | 46.5 (32.2, 62.1)       |                              |
| • Less deprived (below median)            | 116,564 (50.7) | 12,462 (10.7) |                              | 50.9 (36.7, 65.5)       |                              |
| • Missing                                 | 247 (0.1)      | 45 (18.2)     |                              | 47.0 (34.0, 62.1)       |                              |
| Employment                                |                |               | $<1.0 \times 10^{-300}$      |                         | $<1.0 \times 10^{-300}$      |
| • No                                      | 16,140 (7.0)   | 4408 (27.3)   |                              | 45.1 (30.3, 61.7)       |                              |
| • Retired                                 | 80,489 (35.0)  | 10,034 (12.5) |                              | 52.4 (37.8, 66.8)       |                              |
| • Lower working hour (1st quartile)       | 30,645 (13.3)  | 4269 (13.9)   |                              | 49.7 (35.4, 64.2)       |                              |
| • 2nd quartile                            | 21,316 (9.3)   | 2975 (14.0)   |                              | 46.7 (32.9, 62.2)       |                              |
| • 3rd quartile                            | 41,517 (18.1)  | 4852 (11.7)   |                              | 45.7 (31.9, 61.1)       |                              |
| • Higher working hour (4th quartile)      | 37,363 (16.3)  | 3322 (8.9)    |                              | 46.3 (32.6, 61.5)       |                              |
| • Missing                                 | 2362 (1.0)     | 287 (12.2)    |                              | 48.6 (34.6, 63.7)       |                              |
| Diet restriction                          |                |               | $1.1 \times 10^{-36}$        |                         | $1.7 \times 10^{-65}$        |
| • No egg/diary containing food            | 8494 (3.7)     | 1355 (16.0)   |                              | 47.5 (32.9, 63.4)       |                              |
| • No wheat containing food                | 3708 (1.6)     | 694 (18.7)    |                              | 50.3 (35.2, 66.5)       |                              |
| • No sugar or sugar containing food/drink | 39,733 (17.3)  | 4991 (12.6)   |                              | 50.6 (36.0, 65.7)       |                              |
| • Eat all above                           | 177,374 (77.2) | 23,040 (13.0) |                              | 48.5 (34.1, 63.5)       |                              |
| • Missing                                 | 523 (0.2)      | 67 (12.8)     |                              | 48.1 (32.2, 64.6)       |                              |
| Time spend outdoor in summer (in hour)    |                |               | $4.1 \times 10^{-21}$        |                         | $<1.0 \times 10^{-300}$      |
| • None                                    | 342 (0.2)      | 91 (26.6)     |                              | 34.6 (24.2, 51.0)       |                              |
| • <One                                    | 7991 (3.5)     | 1,360 (17.0)  |                              | 40.0 (27.6, 55.6)       |                              |
| • One                                     | 19,378 (8.4)   | 2617 (13.5)   |                              | 43.9 (30.9, 59.0)       |                              |
| • Two                                     | 46,720 (20.3)  | 6166 (13.2)   |                              | 46.5 (32.5, 61.3)       |                              |
| • Three                                   | 37,298 (16.2)  | 4975 (13.3)   |                              | 48.6 (34.3, 63.3)       |                              |
| • Four                                    | 35,537 (15.5)  | 4677 (13.2)   |                              | 50.4 (36.0, 65.3)       |                              |
| • Five                                    | 24,630 (10.7)  | 3246 (13.2)   |                              | 52.1 (37.5, 66.8)       |                              |
| • Six and above                           | 46,642 (20.3)  | 5698 (12.2)   |                              | 53.2 (38.5, 68.1)       |                              |
| • Missing                                 | 11,294 (4.9)   | 1317 (11.7)   |                              | 43.5 (29.8, 59.1)       |                              |
| Time spend outdoor in winter (in hour)    |                |               | $3.5 \times 10^{-18}$        |                         | $<1.0 \times 10^{-300}$      |
| • None                                    | 6326 (2.8)     | 1164 (18.4)   |                              | 44.1 (29.3, 61.5)       |                              |
| • <One                                    | 34,449 (15.0)  | 4725 (13.7)   |                              | 45.9 (31.2, 61.9)       |                              |
| • One                                     | 72,318 (31.5)  | 9492 (13.1)   |                              | 47.4 (33.1, 62.7)       |                              |
| • Two                                     | 53,254 (23.2)  | 6962 (13.1)   |                              | 48.7 (34.2, 63.6)       |                              |
| • Three                                   | 20,446 (8.9)   | 2727 (12.6)   |                              | 49.5 (35.3, 64.3)       |                              |
| • Four                                    | 13,580 (5.9)   | 1711 (12.6)   |                              | 50.0 (35.6, 65.0)       |                              |
| • Five                                    | 6325 (2.8)     | 784 (12.4)    |                              | 50.1 (35.3, 65.0)       |                              |

|   |                           |                |               |                       |                   |                        |
|---|---------------------------|----------------|---------------|-----------------------|-------------------|------------------------|
| • | Six and above             | 11,691 (5.1)   | 1233 (10.6)   |                       | 49.6 (35.3, 65.3) |                        |
| • | Missing                   | 11,443 (5.0)   | 1349 (11.8)   |                       | 45.9 (31.1, 61.9) |                        |
|   | Non-oily fish consumption |                |               | $2.8 \times 10^{-24}$ |                   | $8.8 \times 10^{-219}$ |
| • | Never                     | 9300 (4.1)     | 1520 (16.3)   |                       | 42.9 (28.3, 59.7) |                        |
| • | <Once a week              | 65,158 (28.4)  | 8889 (13.6)   |                       | 47.6 (33.0, 63.0) |                        |
| • | Once a week               | 117,116 (51.0) | 14,478 (12.4) |                       | 49.5 (35.2, 64.4) |                        |
| • | >Once a week              | 37,521 (16.3)  | 5159 (13.8)   |                       | 50.1 (35.9, 65.1) |                        |
| • | Missing                   | 737 (0.3)      | 101 (13.7)    |                       | 45.7 (31.0, 60.8) |                        |
|   | Cheese consumption        |                |               | $2.3 \times 10^{-11}$ |                   | $2.2 \times 10^{-60}$  |
| • | Never                     | 5717 (2.5)     | 817 (14.3)    |                       | 48.8 (33.6, 64.2) |                        |
| • | <Once a week              | 35,525 (15.5)  | 5174 (14.6)   |                       | 49.6 (35.0, 64.8) |                        |
| • | Once a week               | 47,776 (20.8)  | 6143 (12.9)   |                       | 49.5 (34.9, 64.7) |                        |
| • | >Once a week              | 135,724 (59.1) | 17,154 (12.6) |                       | 48.4 (34.0, 63.4) |                        |
| • | Missing                   | 5090 (2.2)     | 859 (16.9)    |                       | 48.6 (33.8, 63.7) |                        |

<sup>1</sup>p-value from likelihood ratio test in logistic regression model adjusted for sex, age, assessment centre, and date of blood sample collected. <sup>2</sup>p-value from likelihood ratio test in linear regression model adjusted for sex, age, assessment centre, and date of blood sample collected.

|                                              |             | Men (n = 104,257)  |                                  |                                               |                                      | Women (n = 98,156) |                                  |                                          |                                      |
|----------------------------------------------|-------------|--------------------|----------------------------------|-----------------------------------------------|--------------------------------------|--------------------|----------------------------------|------------------------------------------|--------------------------------------|
|                                              |             | Depression<br>n(%) | Basic <sup>1</sup><br>OR (95%CI) | Socio-<br>economic <sup>2</sup><br>OR (95%CI) | Lifestyle <sup>3</sup><br>OR (95%CI) | Depression<br>n(%) | Basic <sup>1</sup><br>OR (95%CI) | Socioeconomic <sup>2</sup><br>OR (95%CI) | Lifestyle <sup>3</sup><br>OR (95%CI) |
| Serum<br>level <sup>4</sup>                  | 25(OH)D     |                    |                                  |                                               |                                      |                    |                                  |                                          |                                      |
| •                                            | <25         | 1266 (11.4)        | Reference                        | Reference                                     | Reference                            | 1943 (18.4)        | Reference                        | Reference                                | Reference                            |
| •                                            | ≥25 and <50 | 4034 (9.5)         | 0.68 (0.64, 0.73)                | 0.76 (0.71, 0.82)                             | 0.85 (0.78, 0.91)                    | 6514 (16.4)        | 0.74 (0.70, 0.79)                | 0.77 (0.73, 0.83)                        | 0.86 (0.81, 0.92)                    |
| •                                            | ≥50 and <75 | 3381 (9.0)         | 0.57 (0.53, 0.61)                | 0.66 (0.61, 0.71)                             | 0.78 (0.72, 0.85)                    | 5820 (16.5)        | 0.68 (0.64, 0.73)                | 0.74 (0.69, 0.79)                        | 0.88 (0.82, 0.94)                    |
| •                                            | ≥75         | 1232 (9.4)         | 0.55 (0.50, 0.61)                | 0.63 (0.58, 0.70)                             | 0.78 (0.71, 0.86)                    | 2080 (16.7)        | 0.66 (0.61, 0.72)                | 0.71 (0.66, 0.77)                        | 0.88 (0.81, 0.96)                    |
| Per 50% higher<br>serum 25(OH)D <sup>5</sup> |             | 9913 (9.5)         | 0.83 (0.82, 0.85)                | 0.87 (0.85, 0.89)                             | 0.92 (0.89, 0.94)                    | 16,357 (16.7)      | 0.89 (0.88, 0.91)                | 0.91 (0.90, 0.93)                        | 0.98 (0.95, 0.99)                    |
| P <sub>trend</sub>                           |             |                    | 1.3 × 10 <sup>-76</sup>          | 5.5 × 10 <sup>-41</sup>                       | 1.3 × 10 <sup>-13</sup>              |                    | 1.9 × 10 <sup>-42</sup>          | 4.2 × 10 <sup>-26</sup>                  | 0.02                                 |
| P <sub>curvature</sub>                       |             |                    | 1.2 × 10 <sup>-6</sup>           | 0.01                                          | 0.04                                 |                    | 3.8 × 10 <sup>-6</sup>           | 3.5 × 10 <sup>-4</sup>                   | 0.008                                |

**Table S4.** Association between serum 25(OH)D level and depression among men and women.

<sup>1</sup>Basic model included adjustment for basic covariates including age, assessment centre, and date of blood sample collected. <sup>2</sup>Socioeconomic model included adjustment for basic and socioeconomic-related covariates including education, Townsend deprivation index, and employment. <sup>3</sup>Lifestyle model included adjustment for basic, socioeconomic and lifestyle-related covariates including long standing illness, BMI, physical activity, fish and cheese consumptions, sun exposure [at summer or winter], and use of sun protection. <sup>4</sup>Serum 25(OH)D level expressed in nanomole/litre (nmol/L) unit. <sup>5</sup>natural-log transformed 25(OH)D, and effect estimates transformed to reflect per 50% higher in 25(OH)D

**Table S5.** Association between serum 25(OH)D and depression excluding serum 25(OH)D data from aliquot three blood sample.

|                                           | n(%)          | Depression<br>n(%) | Odds of Depression (n = 197,921)  |                                            |                                       |
|-------------------------------------------|---------------|--------------------|-----------------------------------|--------------------------------------------|---------------------------------------|
|                                           |               |                    | Basic <sup>1</sup><br>OR (95% CI) | Socio-economic <sup>2</sup><br>OR (95% CI) | Lifestyle <sup>3</sup><br>OR (95% CI) |
| Serum 25(OH)D level <sup>4</sup>          |               |                    |                                   |                                            |                                       |
| <25                                       | 21,230 (10.7) | 3149 (14.8)        | Reference                         | Reference                                  | Reference                             |
| ≥25 and <50                               | 80,581 (40.7) | 10,345 (12.8)      | 0.72 (0.68, 0.77)                 | 0.77 (0.73, 0.80)                          | 0.85 (0.81, 0.89)                     |
| ≥50 and <75                               | 71,146 (36.0) | 8992 (12.6)        | 0.64 (0.60, 0.67)                 | 0.70 (0.66, 0.73)                          | 0.83 (0.79, 0.88)                     |
| ≥75                                       | 24,964 (12.6) | 3247 (13.0)        | 0.62 (0.58, 0.66)                 | 0.67 (0.63, 0.71)                          | 0.83 (0.78, 0.89)                     |
| Per 50% higher serum 25(OH)D <sup>5</sup> | 197,921       | 25,733 (13.0)      | 0.87 (0.86, 0.89)                 | 0.90 (0.88, 0.91)                          | 0.95 (0.94, 0.96)                     |
| P <sub>trend</sub>                        |               |                    | 2.1 × 10 <sup>-72</sup>           | 4.9 × 10 <sup>-50</sup>                    | 4.3 × 10 <sup>-12</sup>               |
| P <sub>curvature</sub>                    |               |                    | 2.4 × 10 <sup>-11</sup>           | 4.3 × 10 <sup>-6</sup>                     | 3.8 × 10 <sup>-4</sup>                |
| P <sub>sex-interaction</sub>              |               |                    | 3.3 × 10 <sup>-6</sup>            | 6.5 × 10 <sup>-4</sup>                     | 7.3 × 10 <sup>-4</sup>                |
| P <sub>age-interaction</sub>              |               |                    | 0.02                              | 0.03                                       | 0.05                                  |

<sup>1</sup> Basic model included adjustment for basic covariates including age, sex, assessment centre, and date of blood sample collected. <sup>2</sup>

Socio-economic model included adjustment for basic and socioeconomic-related covariates including education, Townsend deprivation index, and employment. <sup>3</sup>

Lifestyle model included adjustment for basic, socioeconomic and

lifestyle-related covariates including long standing illness, BMI, physical activity, fish and cheese consumptions, sun exposure [at summer or winter], and use of sun protection. <sup>4</sup>Serum 25(OH)D level expressed in nanomoles per litres (nmol/L) unit. <sup>5</sup> Natural-log transformed 25(OH)D, and effect estimates transformed to reflect per 50% higher in 25(OH)D

**Table S6.** The causal estimates for the association between 25(OH)D and depression using two, four and all 25(OH)D variants as the instrument in the two-sample MR analysis

| Exposure | Outcome    | Method           |          | Odds ratio per 50% higher in serum25(OH)D |      |      |      | #SNP | Loci included in the analysis              |
|----------|------------|------------------|----------|-------------------------------------------|------|------|------|------|--------------------------------------------|
|          |            |                  |          | OR                                        | LCI  | UCI  | P    |      |                                            |
| 25(OH)D  | Depression | Inverse weighted | variance | 1.06                                      | 0.89 | 1.26 | 0.52 | 2    | DHCR7 and CYP2R1                           |
| 25(OH)D  | Depression | Inverse weighted | variance | 0.96                                      | 0.88 | 1.04 | 0.30 | 4    | GC,AMDHD1,SEC23A,and CYP24A1               |
| 25(OH)D  | Depression | Inverse weighted | variance | 0.97                                      | 0.90 | 1.05 | 0.52 | 6    | DHCR7, CYP2R1,GC,AMDHD1,SEC23A,and CYP24A1 |

Variant-25(OH)D association estimates was taken from Jiang et al GWAS (3) and the variant-depression association estimates were from analysis in the UK Biobank. #SNP: number of SNP included in the analysis

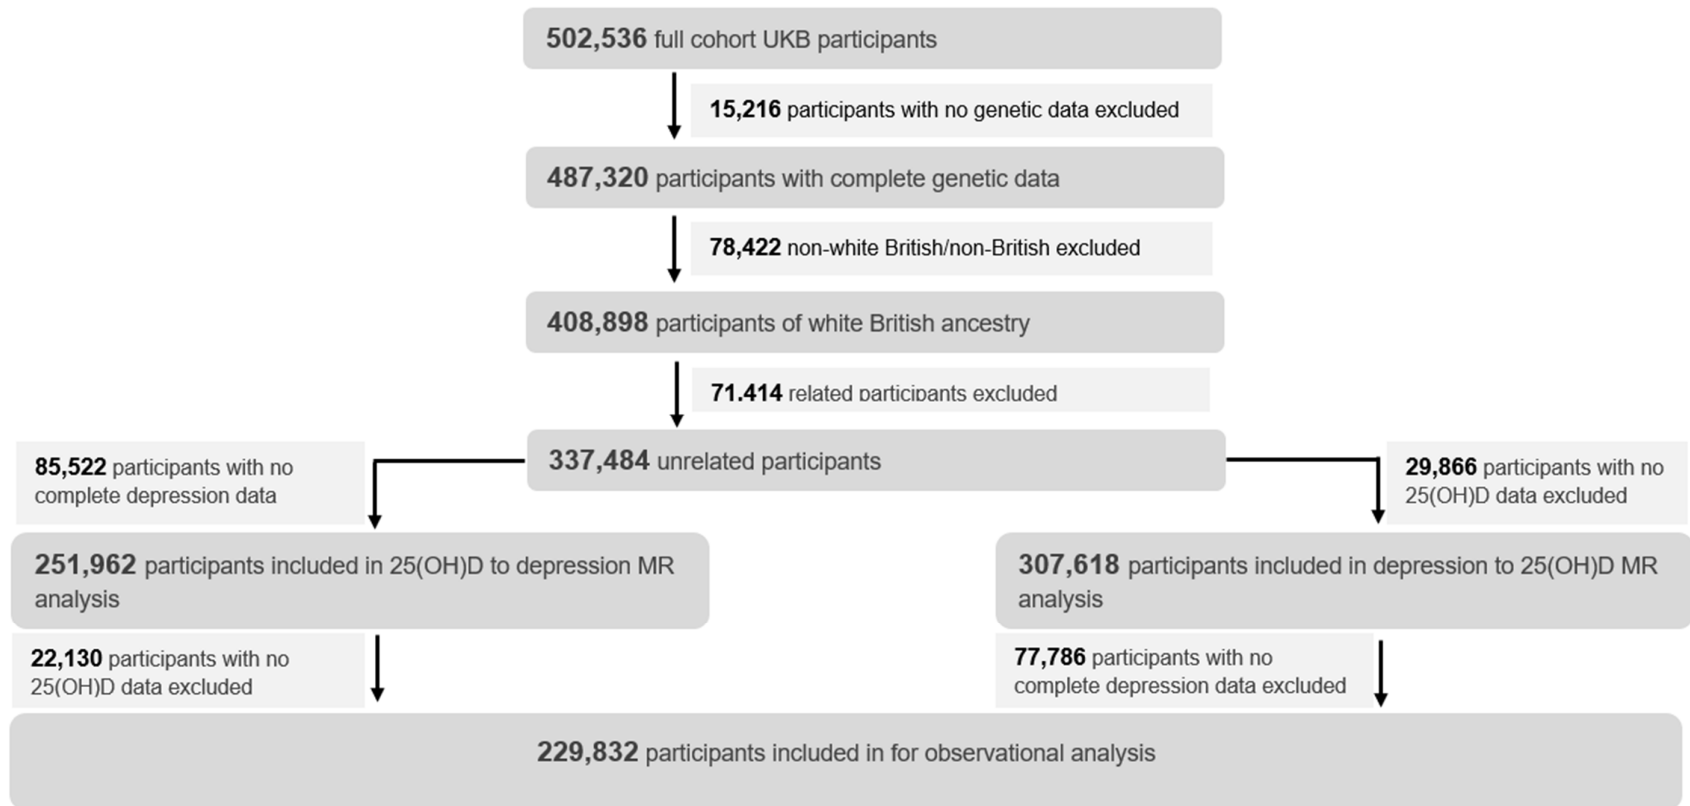

**Figure S1.** Flow of UK Biobank participants included in the bi-directional analysis between serum 25(OH)D and depression.



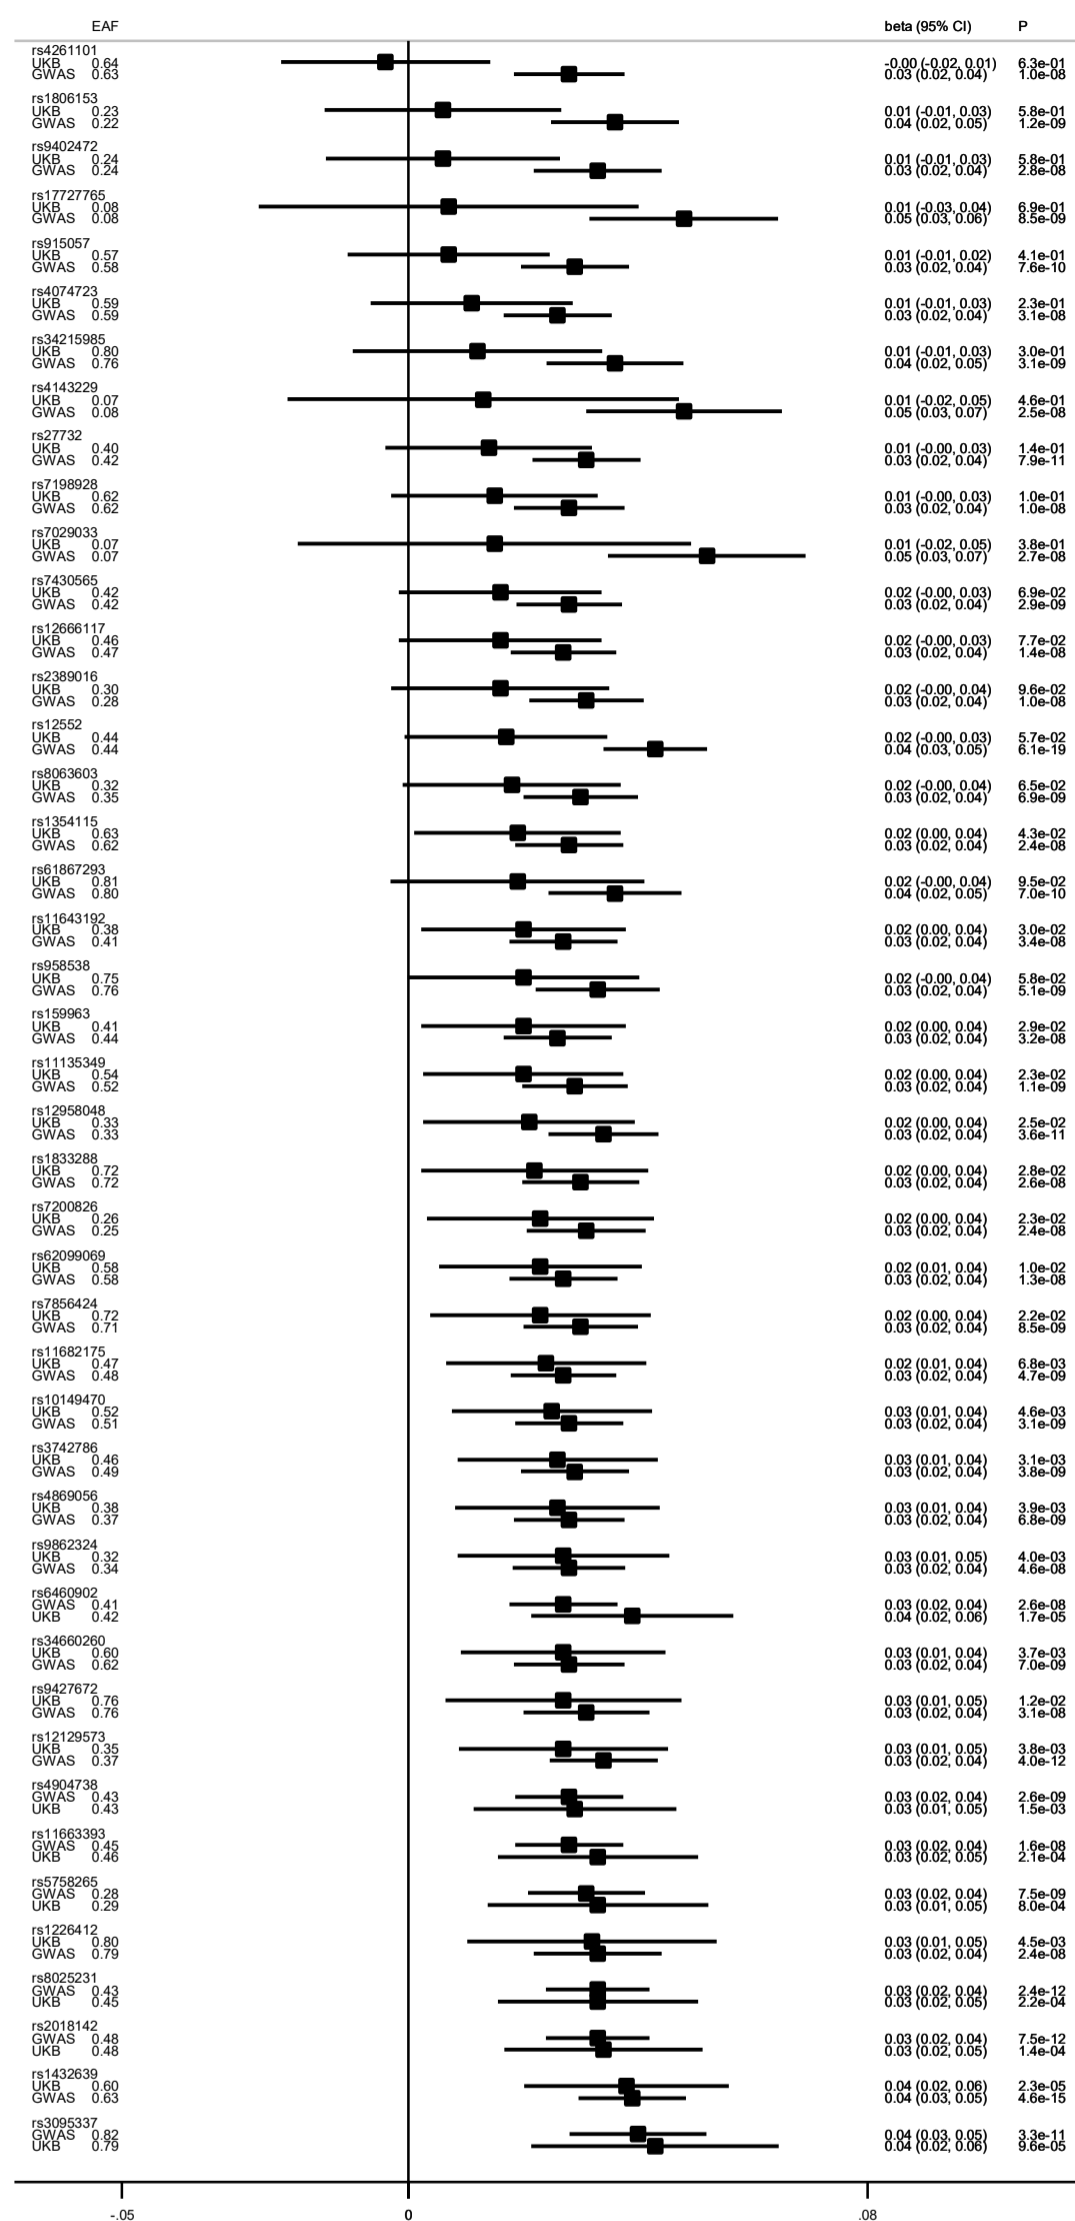

Figure S2. Association between MDD-related variants and depression in UK Biobank versus discovery GWAS.

**Panel A**

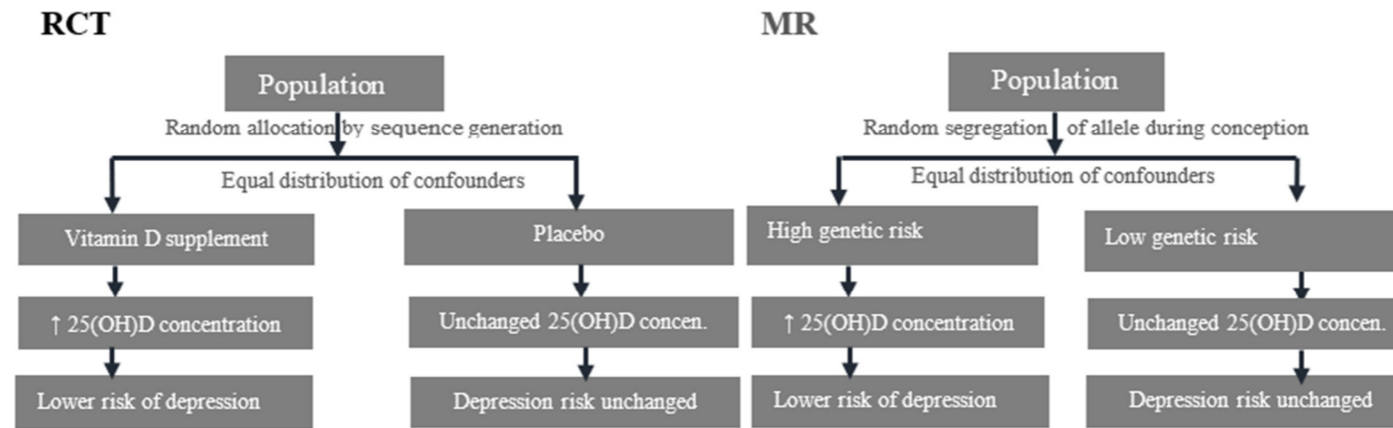

**Panel B**

| Analytical strategy              | 25(OH)D → Depression                                                                                                                                                                                         | Depression → 25(OH)D                                                                                                                                                                                         |
|----------------------------------|--------------------------------------------------------------------------------------------------------------------------------------------------------------------------------------------------------------|--------------------------------------------------------------------------------------------------------------------------------------------------------------------------------------------------------------|
| <b>Observational association</b> |                                                                                                                                                                                                              |                                                                                                                                                                                                              |
| Data                             | UK Biobank                                                                                                                                                                                                   | UK Biobank                                                                                                                                                                                                   |
| Adjustment models                |                                                                                                                                                                                                              |                                                                                                                                                                                                              |
| Model-1                          | Age, sex, assessment center, and blood sample collection date                                                                                                                                                | Age, sex, assessment center, and blood sample collection date                                                                                                                                                |
| Model-2                          | Model-1 + Townsend deprivation, education, and employment                                                                                                                                                    | Model-1 + Townsend deprivation, education, and employment                                                                                                                                                    |
| Model-3                          | Model-1 + Model-2 + smoking, alcohol consumption, BMI, physical activity, sun exposure in summer and winter, use of sun protection, diet restriction, fish and cheese consumption, and long standing illness | Model-1 + Model-2 + smoking, alcohol consumption, BMI, physical activity, sun exposure in summer and winter, use of sun protection, diet restriction, fish and cheese consumption, and long standing illness |
| <b>Mendelian randomisation</b>   |                                                                                                                                                                                                              |                                                                                                                                                                                                              |
| Data                             | UK Biobank and Consortia                                                                                                                                                                                     | UK Biobank and Consortia                                                                                                                                                                                     |
| Genetic instrument               | Six 25(OH)-related variants from Jiang <i>et al.</i> GWAS (main analysis)<br><br>122 25(OH)D-related variants from Revez <i>et al.</i> GWAS which is based on UK Biobank (sensitivity analysis)              | 44 major depressive disorder (MDD)-related variants from Wray <i>et al.</i> GWAS (main analysis)<br>17 MDD-related variants from Hyde <i>et al.</i> GWAS (sensitivity analysis)                              |
| Variant-exposure estimates       | From Jiang <i>et al.</i> or Revez <i>et al.</i> GWAS depending on the instrument                                                                                                                             | From Wray <i>et al.</i> or Hyde <i>et al.</i> GWAS depending on the instrument                                                                                                                               |
| Variant-outcome estimates        | From UK Biobank (from model adjusted for age, sex, assessment centre, 40 principal components and genotyping array)<br>From Consortia (Wray <i>et al.</i> GWAS summary reports)                              | From UK Biobank (from model adjusted for age, sex, assessment centre, 40 principal components and genotyping array)<br>From consortia (Jiang <i>et al.</i> GWAS summary reports)                             |
| MR-methods used                  | Inverse variance weight (MR IVW)<br>MR-PRESSO<br>Weighted median<br>Weighted mode<br>MR-Egger                                                                                                                | Inverse variance weight (MR IVW)<br>MR-PRESSO<br>Weighted median<br>Weighted mode<br>MR-Egger                                                                                                                |
| Pleiotropy test                  | MR-Egger p-intercept<br>MR-PRESSO outlier and distortion tests<br>Leave-one-out analysis                                                                                                                     | MR-Egger p-intercept<br>MR-PRESSO outlier and distortion tests<br>Leave-one-out analysis                                                                                                                     |

**Figure S3.** Comparison of randomized control trial (RCT) with Mendelian randomization (MR) (2) (**Panel A**), and Summary of analyses strategy (**Panel B**).

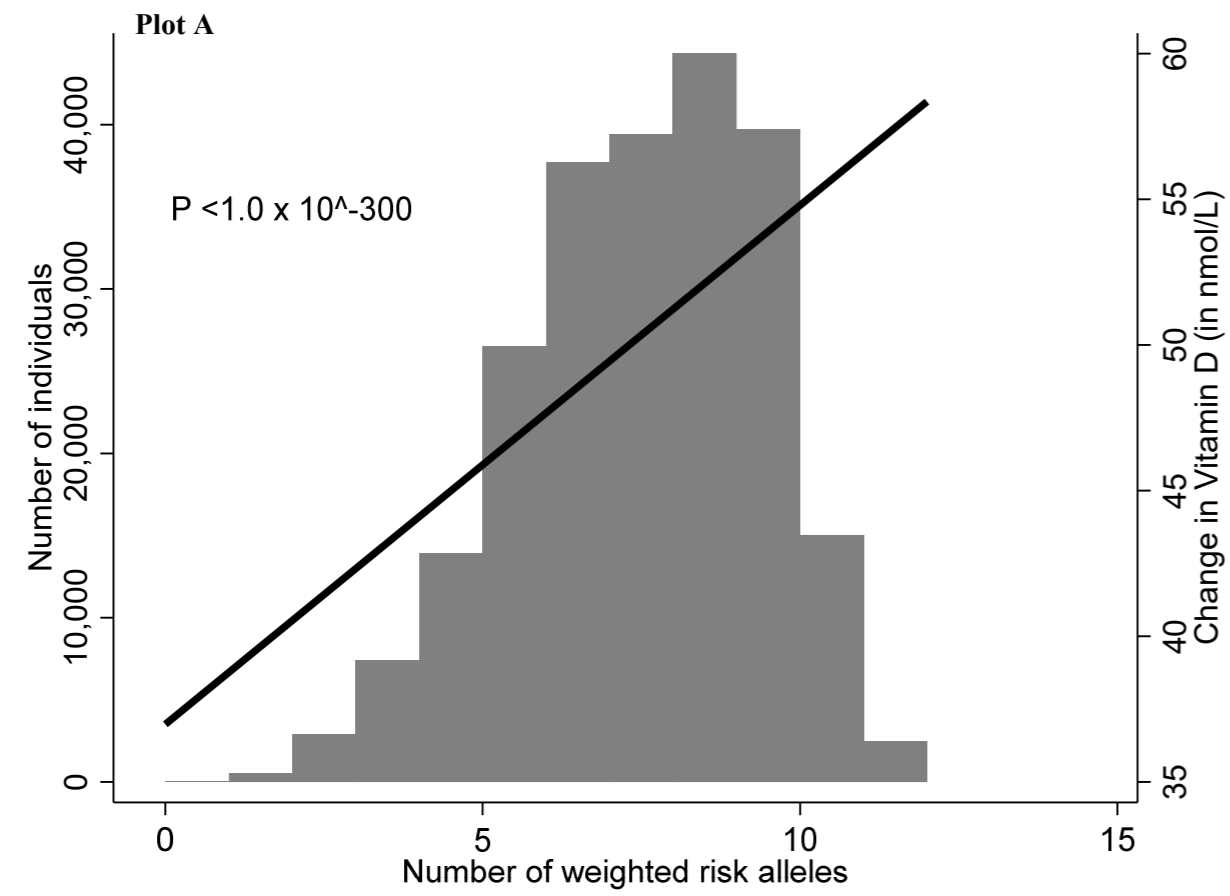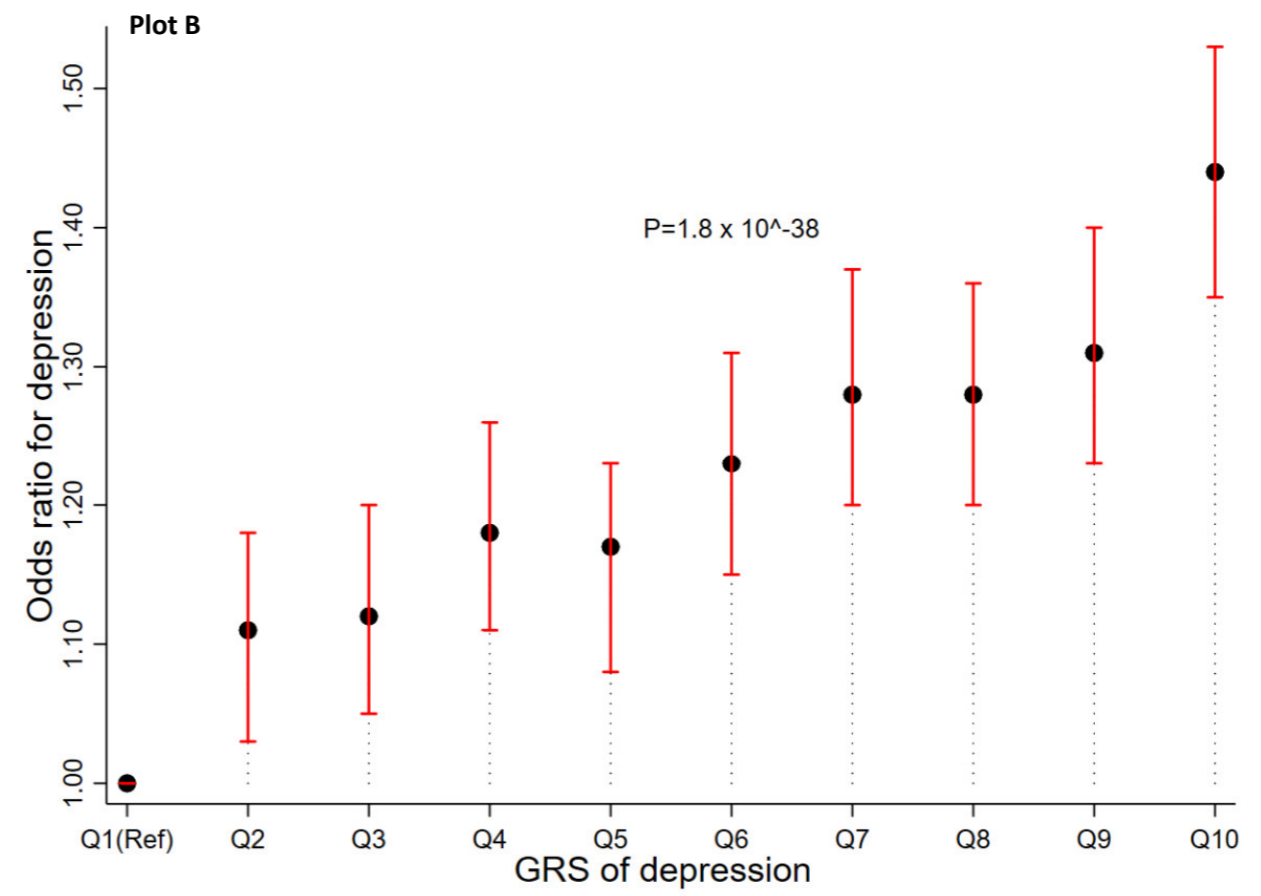

**Figure S4.** Genetic instrument validation. **Plot A** shows the distribution of 25(OH)D genetic risk score (GRS), and its association with 25(OH)D in UK Biobank, with the weighted GRS explains 2.7% of the variability in 25(OH)D. **Plot B** shows the association between GRS in ten-quantiles and depression in UK Biobank, with the weighted GRS explains 0.2% of the variability in the depression.

25(OH)D on Depression

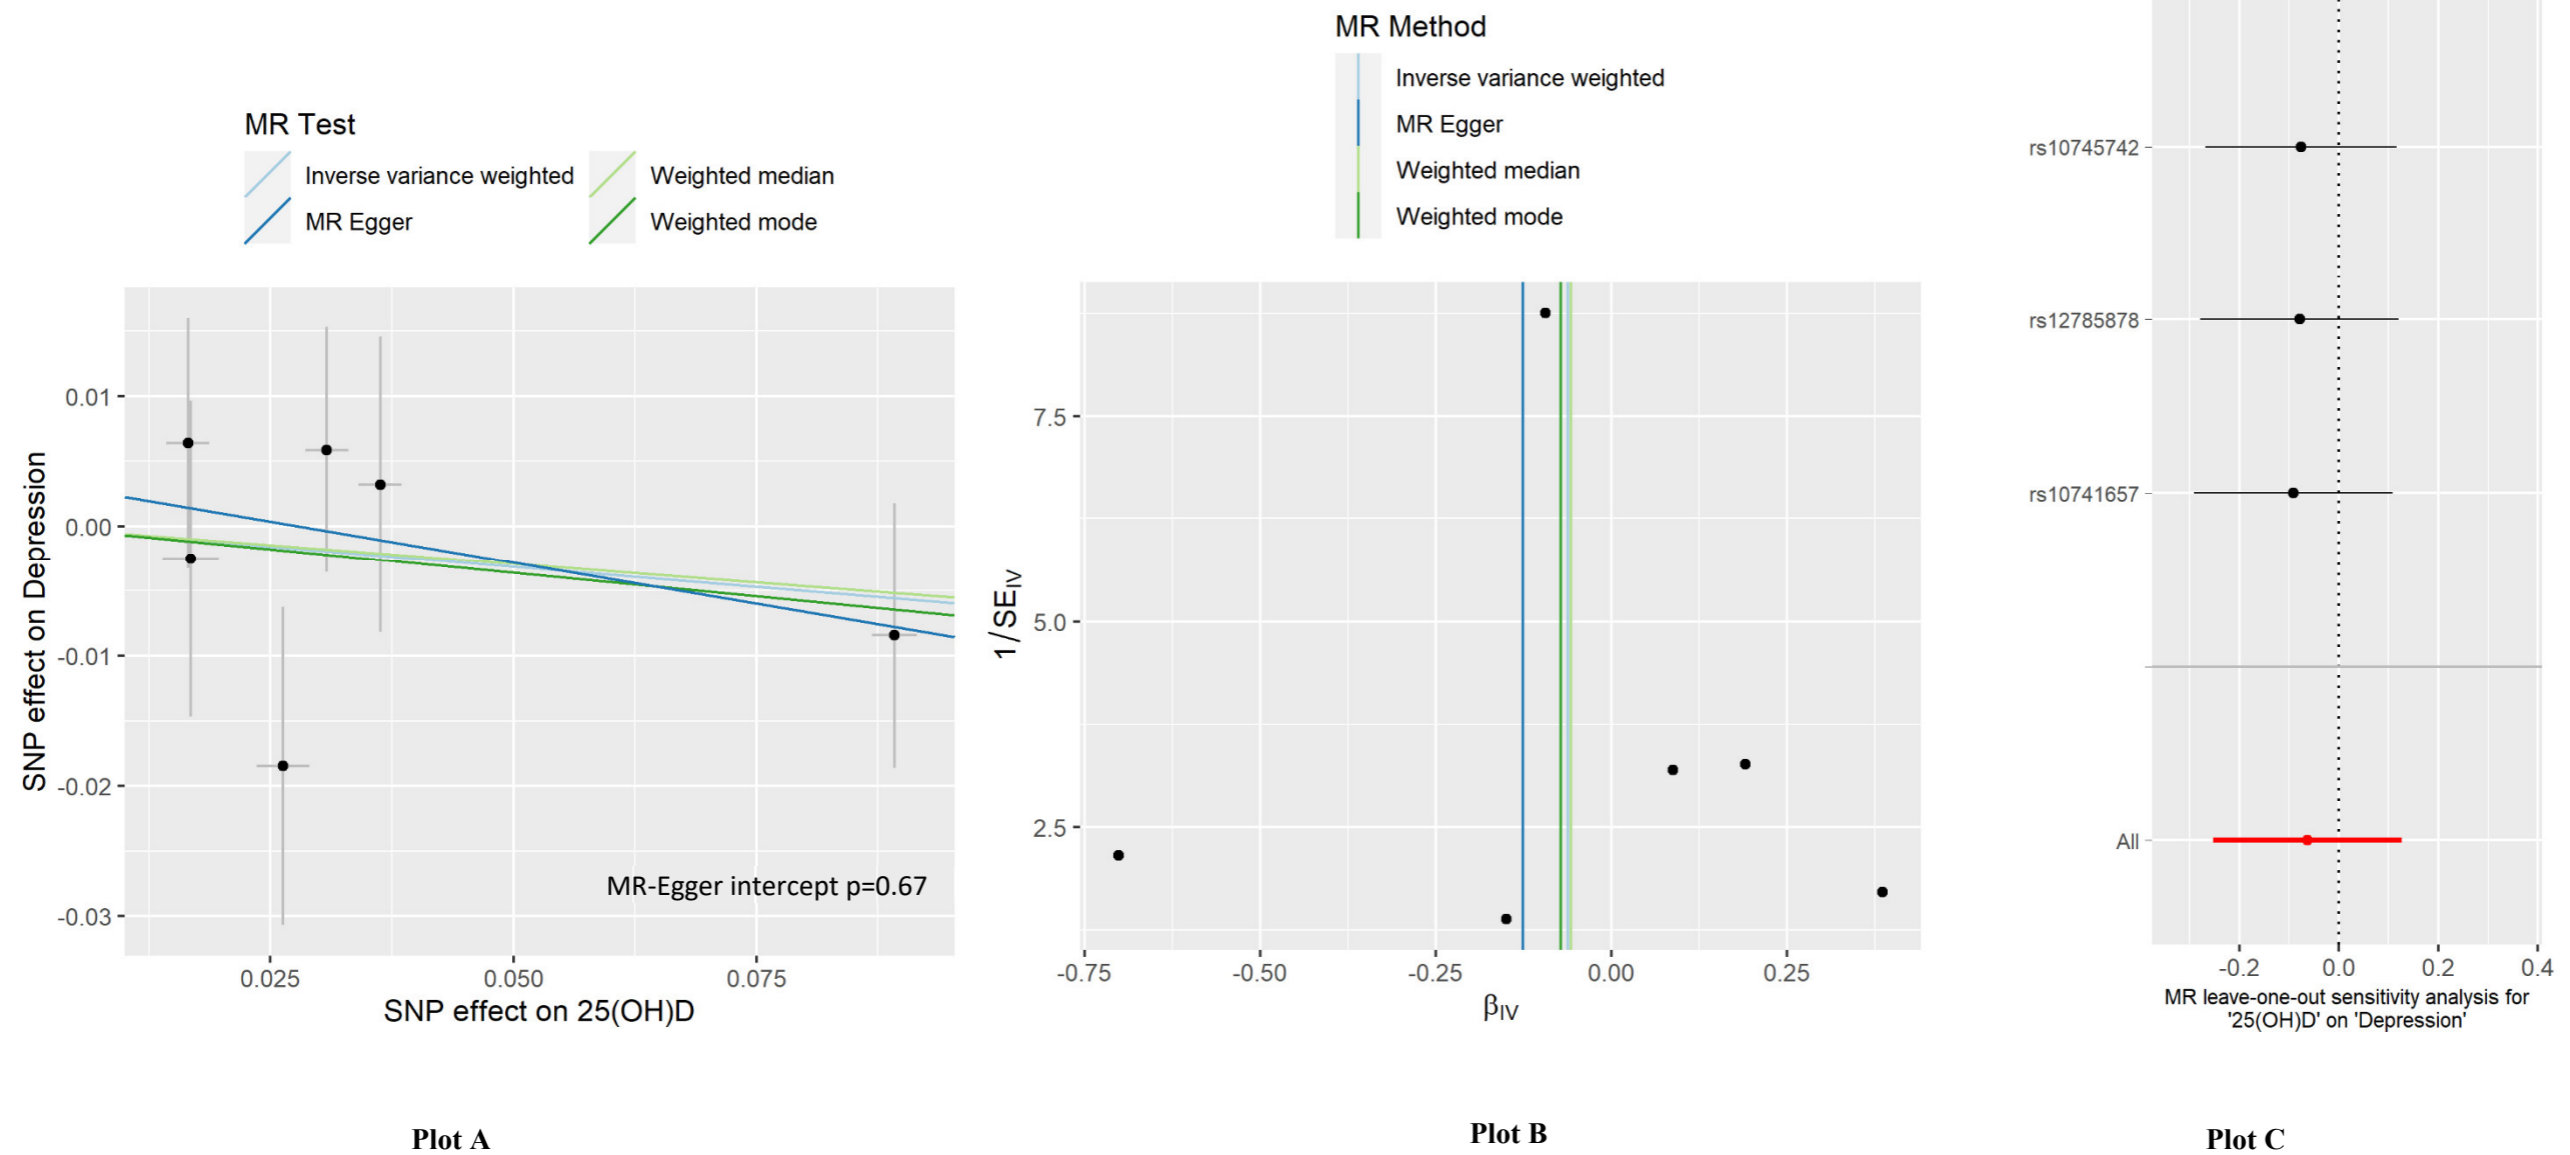

**Figure S5.** Plots from two-sample MR analysis of 25(OH)D on depression. **Plot A** shows the Scatter plot of the estimates of variant-depression association against estimates of variant-25(OH)D association. **Plot B** shows the funnel plots of instrument strength against causal estimate ( $\beta_{IV}$ ). **Plot C** includes leave-one-out analyses, demonstrating the effect on the overall MR IVW estimate by excluding each of the six variants one at a time.

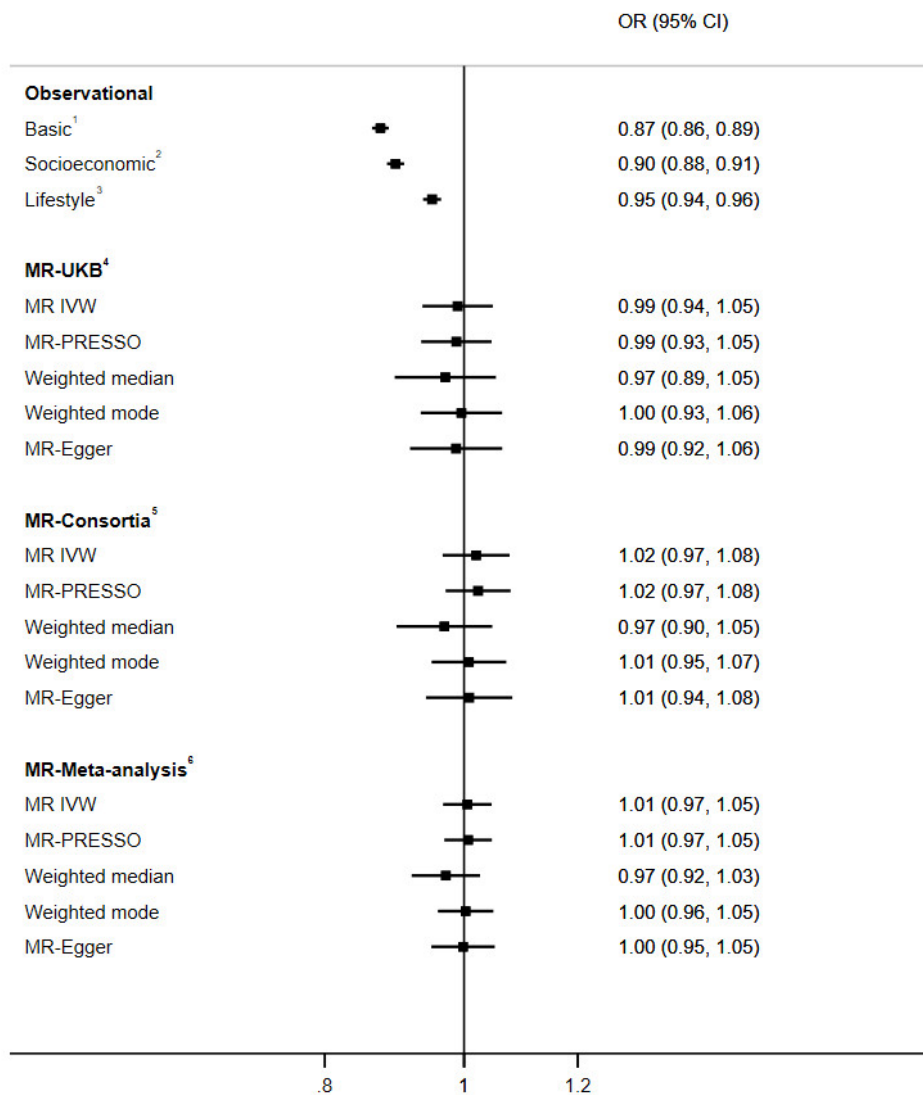

**Figure S6.** Observational and MR analyses on the association between 25(OH)D (using the 122 25(OH)D-related variants from Revez et al (6)) and the odds of depression. <sup>1</sup> Basic model included adjustment for basic covariates including age, sex, assessment center, and date of blood sample collected. <sup>2</sup> Socioeconomic model included adjustment for basic and socioeconomic-related covariates including education, Townsend deprivation index, and employment. <sup>3</sup> Lifestyle model included adjustment for basic, socioeconomic and lifestyle-related covariates including smoking, alcohol consumption, BMI, physical activity, fish and cheese consumptions, dietary restriction, sun exposure [in summer or winter], use of sun protection, and long standing illness. <sup>4</sup> MR analysis based on variant-depression association estimates from UK Biobank. <sup>5</sup> MR-analysis based on variant-depression association estimates from Wray et al GWAS. <sup>6</sup> Meta-analysis of MR estimates from UK Biobank and Wray et al GWAS. For all MR analysis, variant-25(OH)D estimates were from UK Biobank, subsetting the analyse to participants with no depression (Control) to minimise the bias from sample overlap. MR-Egger P-intercept (for all),  $p < 0.62$ .

Depression on 25(OH) D

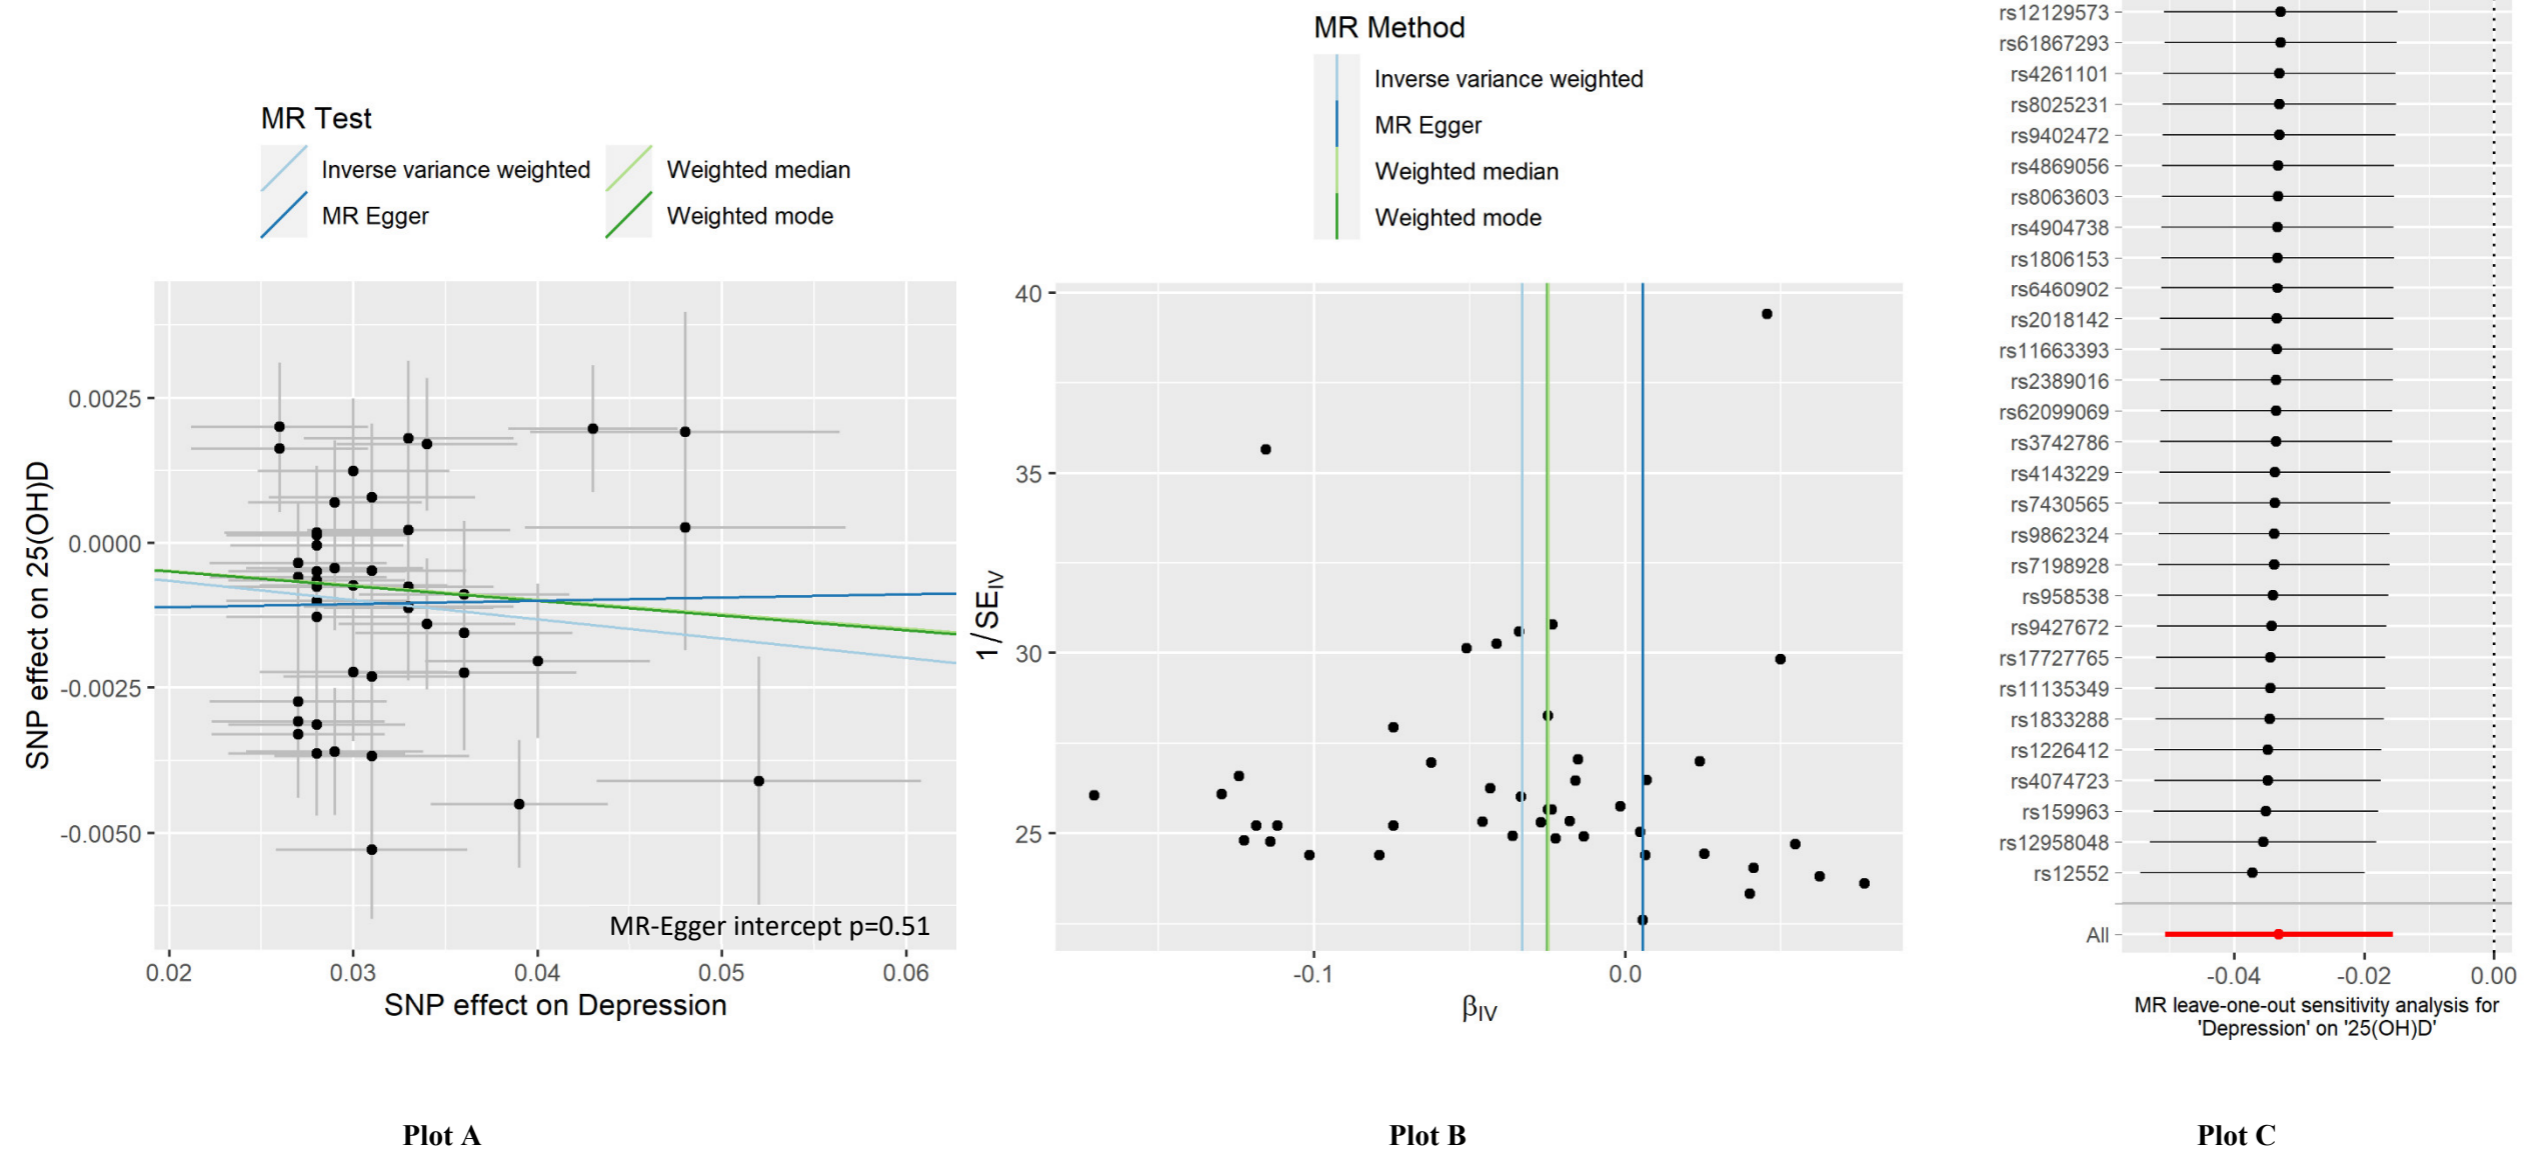

**Figure S7.** Plots from two-sample MR analysis of depression on 25(OH)D. **Plot A** shows the scatter plot of the estimates of variant-25(OH)D association against estimates of variant-depression association. **Plot B** shows the funnel plots of instrument strength against causal estimate ( $\beta_{IV}$ ). **Plot C** includes leave-one-out analyses, demonstrating the effect on the overall MR IVW estimate by excluding each of the 44 variants one at a time.

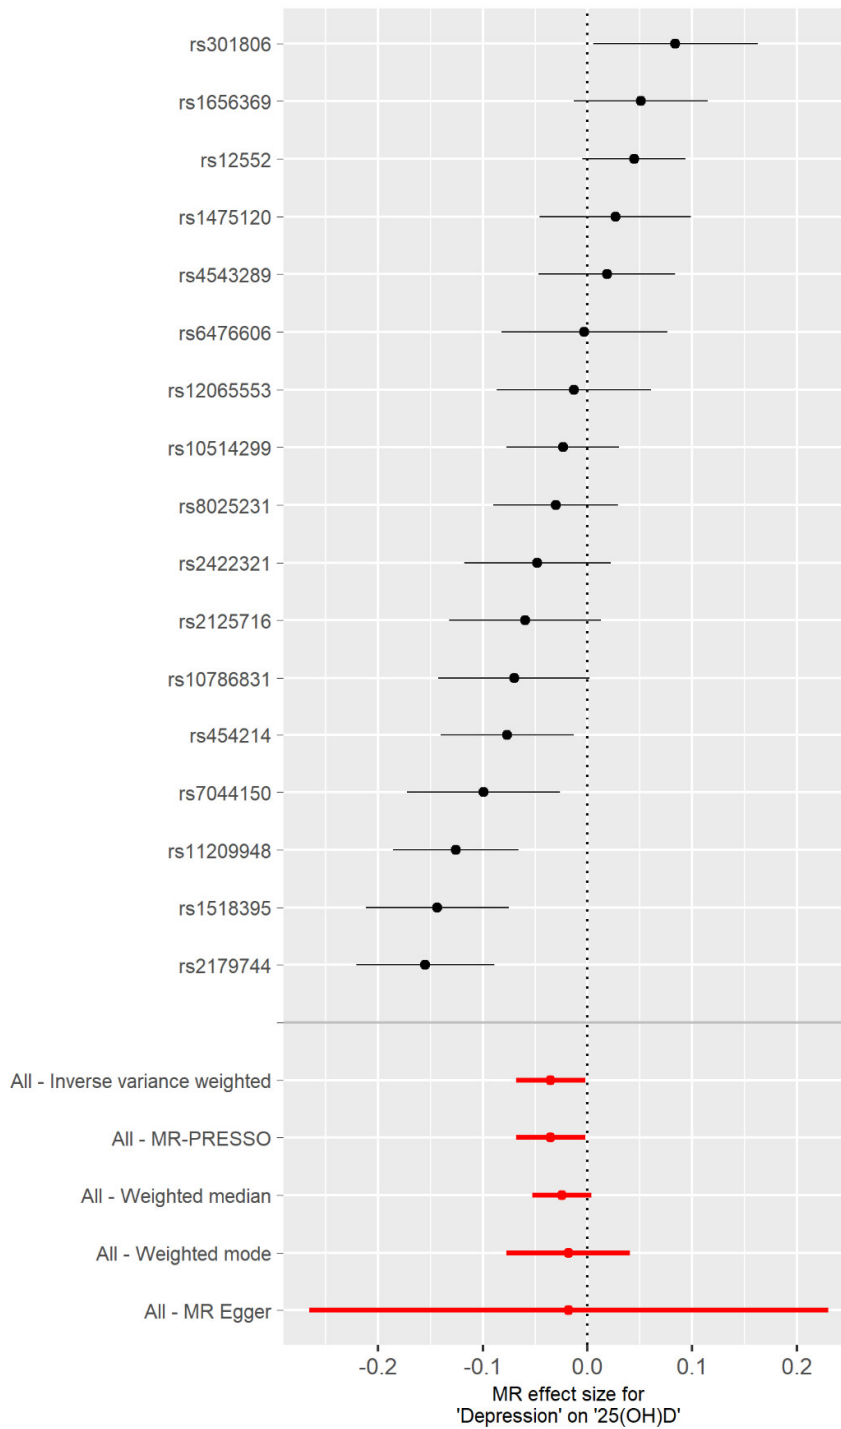

**Figure S8.** Two-sample MR estimates from different MR approaches using 17 major depression-related genetic variants from Hyde et al (5). MR Egger intercept  $p$ -value = 0.87.

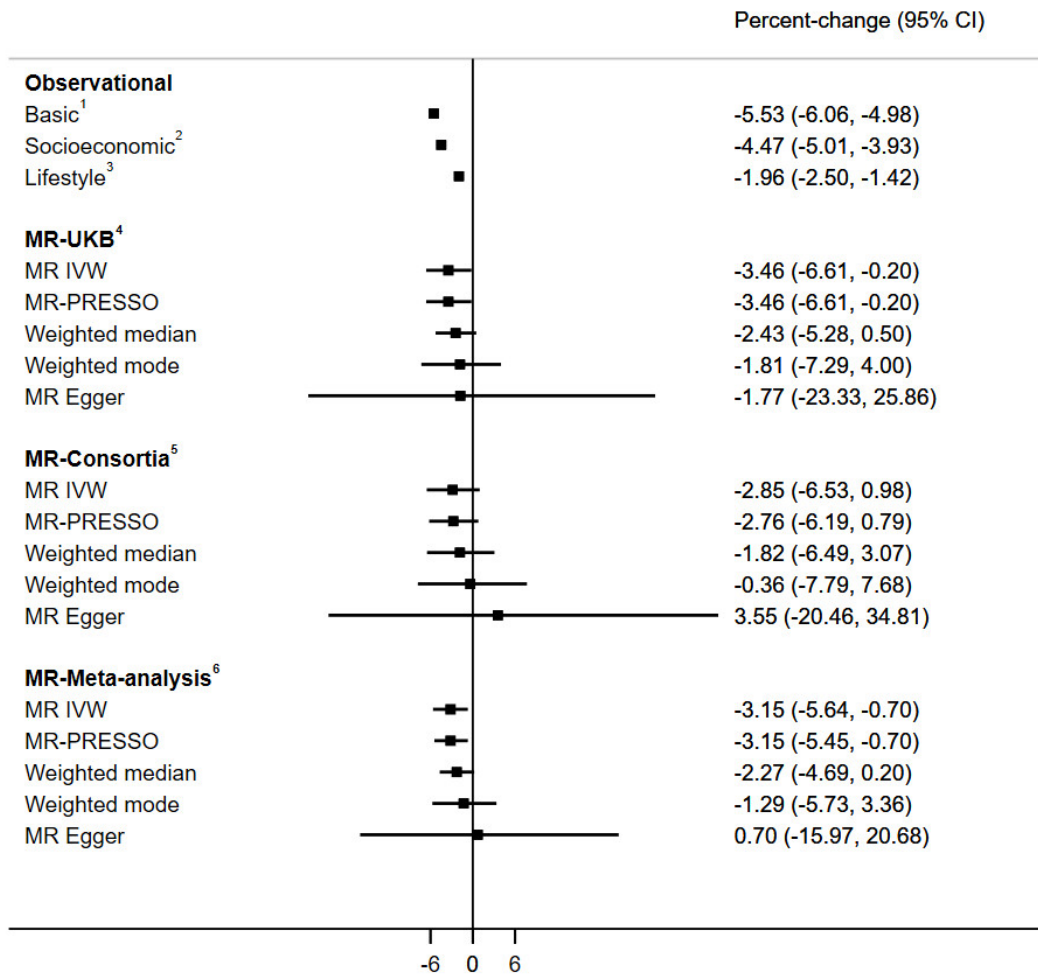

**Figure S9.** Percent change in serum 25(OH)D associated with depression (Observational), or genetically determined depression (MR) using 17 major depression-related genetic variants from Hyde et al (5). X-axis is percent change. We used  $100 \times (\exp(\beta)-1)$  to get percent increase/decrease

<sup>1</sup> Basic model included adjustment for basic covariates including age, sex, assessment centre, and date of blood sample collected. <sup>2</sup> Socioeconomic model included adjustment for basic and socioeconomic-related covariates including education, Townsend deprivation index, and employment. <sup>3</sup> Lifestyle model included adjustment for basic, socioeconomic and lifestyle-related smoking, alcohol consumption, BMI, physical activity, fish and cheese consumptions, dietary restriction, sun exposure [in summer or winter], use of sun protection, and long standing illness. <sup>4</sup> MR analysis based on variant-serum 25(OH)D association estimates from UK Biobank. <sup>5</sup> MR-analysis based on variant-serum 25(OH)D association estimates from Jiang et al GWAS (3). <sup>6</sup> Meta-analysis of MR estimates from UK Biobank and Jiang et al GWAS. For all MR analysis, variant-depression estimates were from Hyde et al (5). MR-Egger P-intercept (for all),  $p < 0.87$ .



## References

1. Lawlor, D.A.; Harbord, R.M.; Sterne, J.A.; Timpson, N.; Davey Smith, G. Mendelian randomization: Using genes as instruments for making causal inferences in epidemiology. *Statistics in medicine* **2008**, *27*, 1133-1163.
2. Davies, N.M.; Holmes, M.V.; Davey Smith, G. Reading Mendelian randomisation studies: A guide, glossary, and checklist for clinicians. *BMJ* **2018**, *362*, k601.
3. Jiang, X.; O'Reilly, P.F.; Aschard, H.; Hsu, Y.H.; Richards, J.B.; Dupuis, J.; Ingelsson, E.; Karasik, D.; Pilz, S.; Berry, D.; et al. Genome-wide association study in 79,366 European-ancestry individuals informs the genetic architecture of 25-hydroxyvitamin D levels. *Nature communications* **2018**, *9*, 260.
4. Wray, N.R.; Ripke, S.; Mattheisen, M.; Trzaskowski, M.; Byrne, E.M.; Abdellaoui, A.; Adams, M.J.; Agerbo, E.; Air, T.M.; Andlauer, T.M.F.; et al. Genome-wide association analyses identify 44 risk variants and refine the genetic architecture of major depression. *Nat. Genet.* **2018**, *50*, 668-681.
5. Hyde, C.L.; Nagle, M.W.; Tian, C.; Chen, X.; Paciga, S.A.; Wendland, J.R.; Tung, J.Y.; Hinds, D.A.; Perlis, R.H.; Winslow, A.R. Identification of 15 genetic loci associated with risk of major depression in individuals of European descent. *Nat. Genet.* **2016**, *48*, 1031-1036.
6. Revez, J.A.; Lin, T.; Qiao, Z.; Xue, A.; Holtz, Y.; Zhu, Z.; Zeng, J.; Wang, H.; Sidorenko, J.; Kemper, K.E.; et al. Genome-wide association study identifies 143 loci associated with 25 hydroxyvitamin D concentration. *Nature communications* **2020**, *11*, 1647.
